# Supplementary figures and images for: Mice and primates use distinct strategies for visual segmentation
Source: eLife journal article supplement (doi:10.7554/elife.74394), 2023-02-15

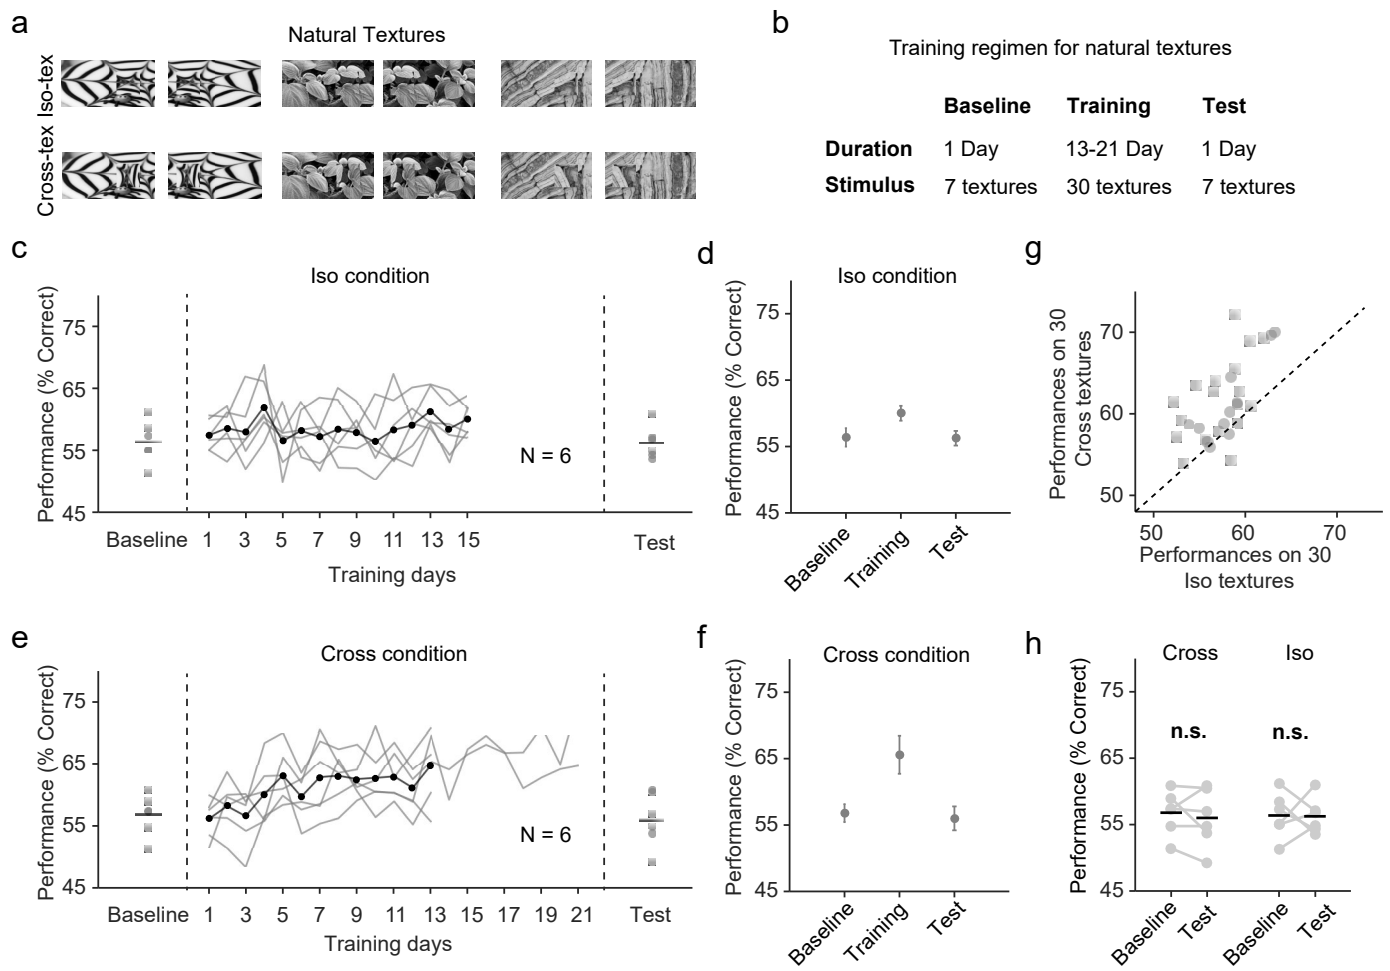

Figure 2-figure supplement 1

Supplement: supp [file elife-74394-supp-v1.zip]

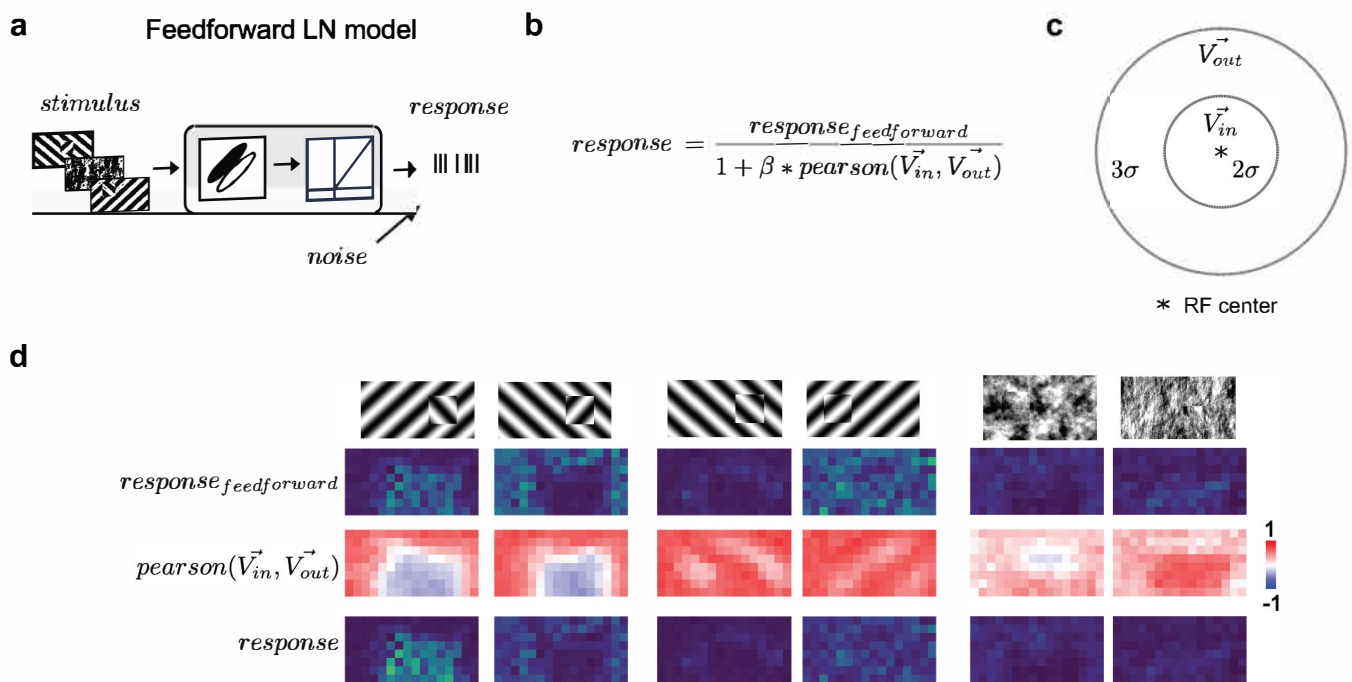

**Figure 7-figure supplement 3**

Supplement: supp [file elife-74394-supp-v1.zip]

**a1**

## Training workflow

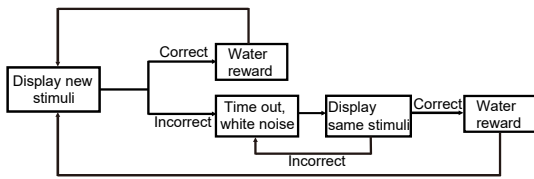**a2**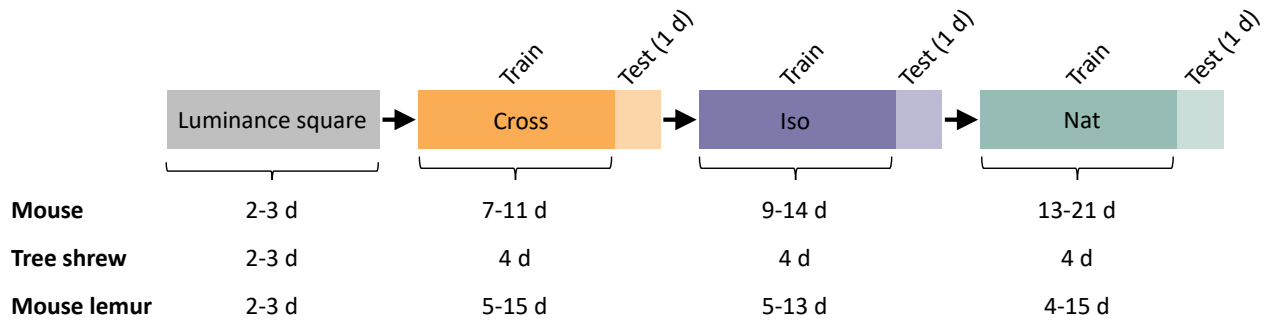**b1**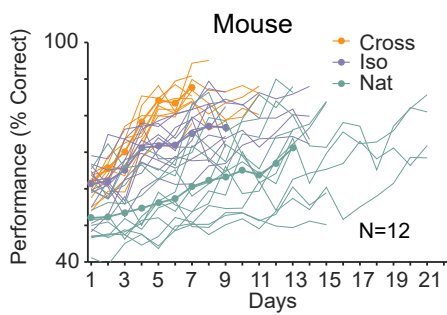**b2**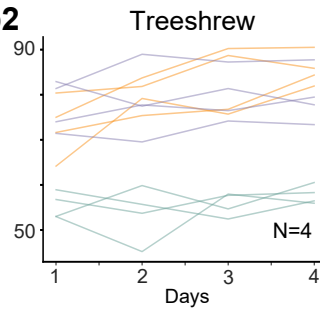**b3**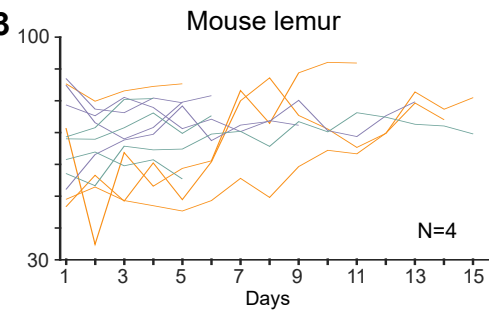**b4**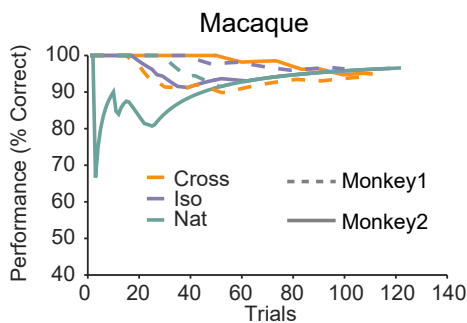**c**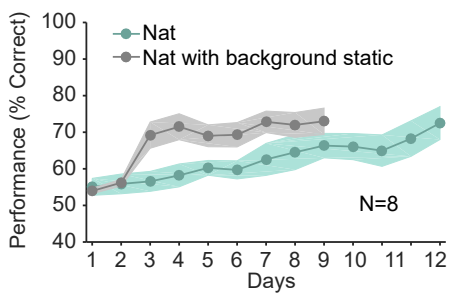

Figure 2-figure supplement 2

Supplement: supp [file elife-74394-supp-v1.zip]

**a**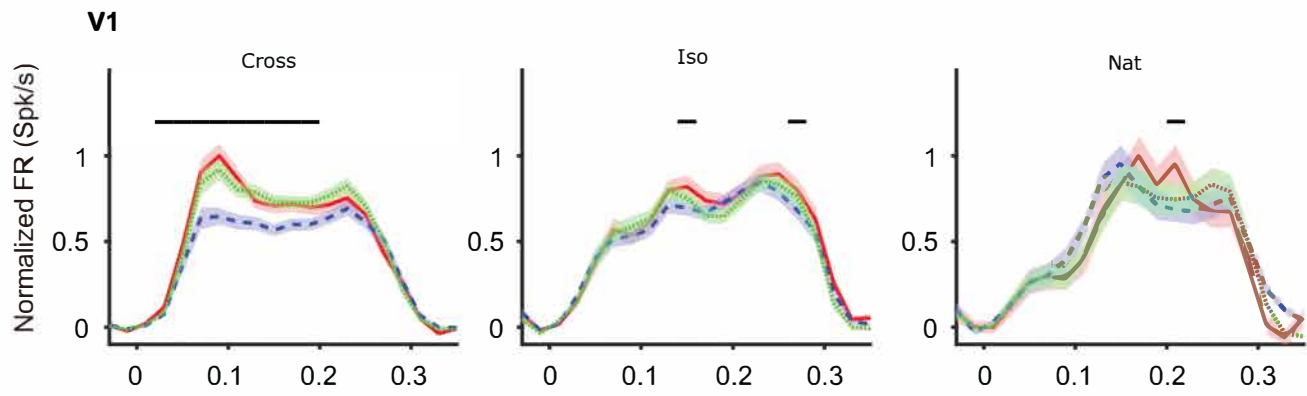**b**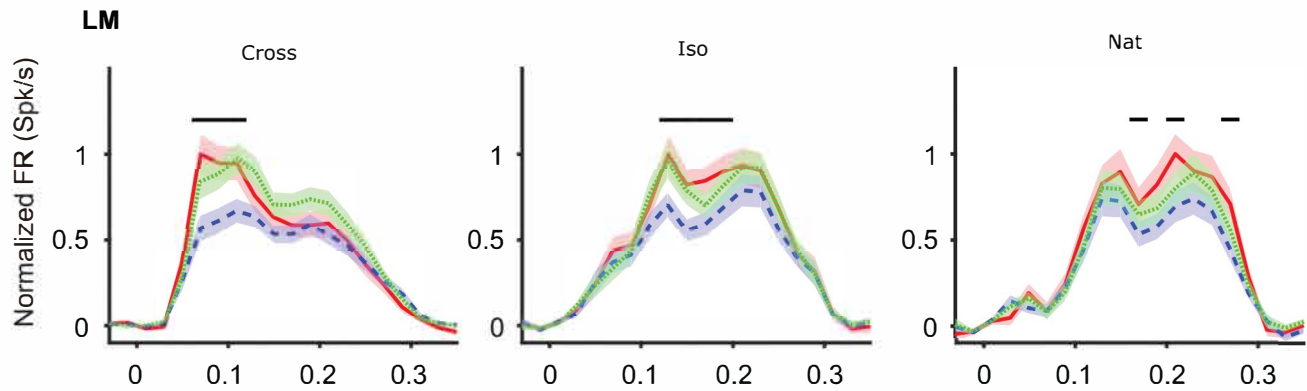**c**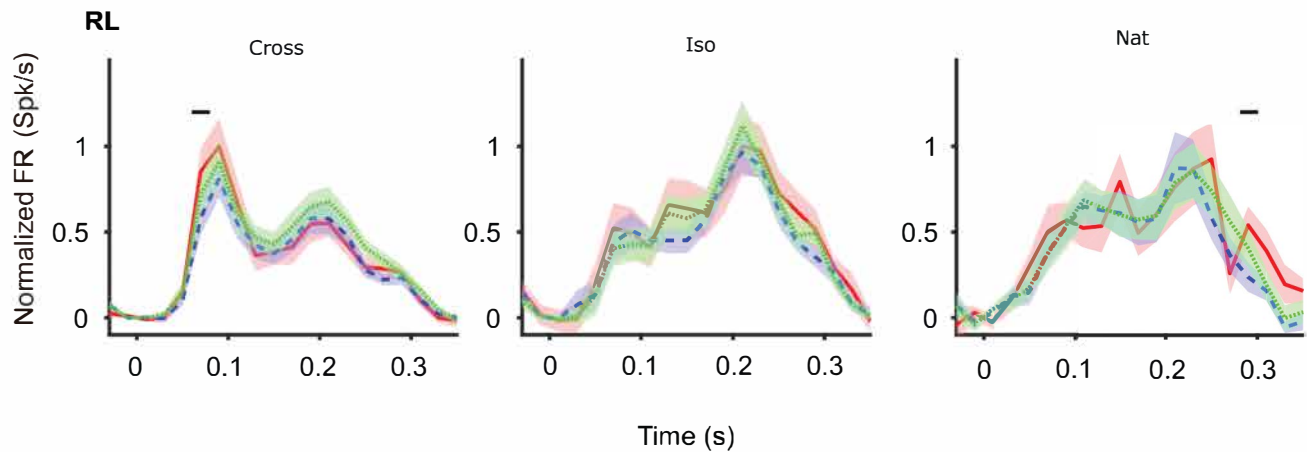

— Figure  
..... Border  
- - - Background

# Figure 5-figure supplement 1

Supplement: supp [file elife-74394-supp-v1.zip]

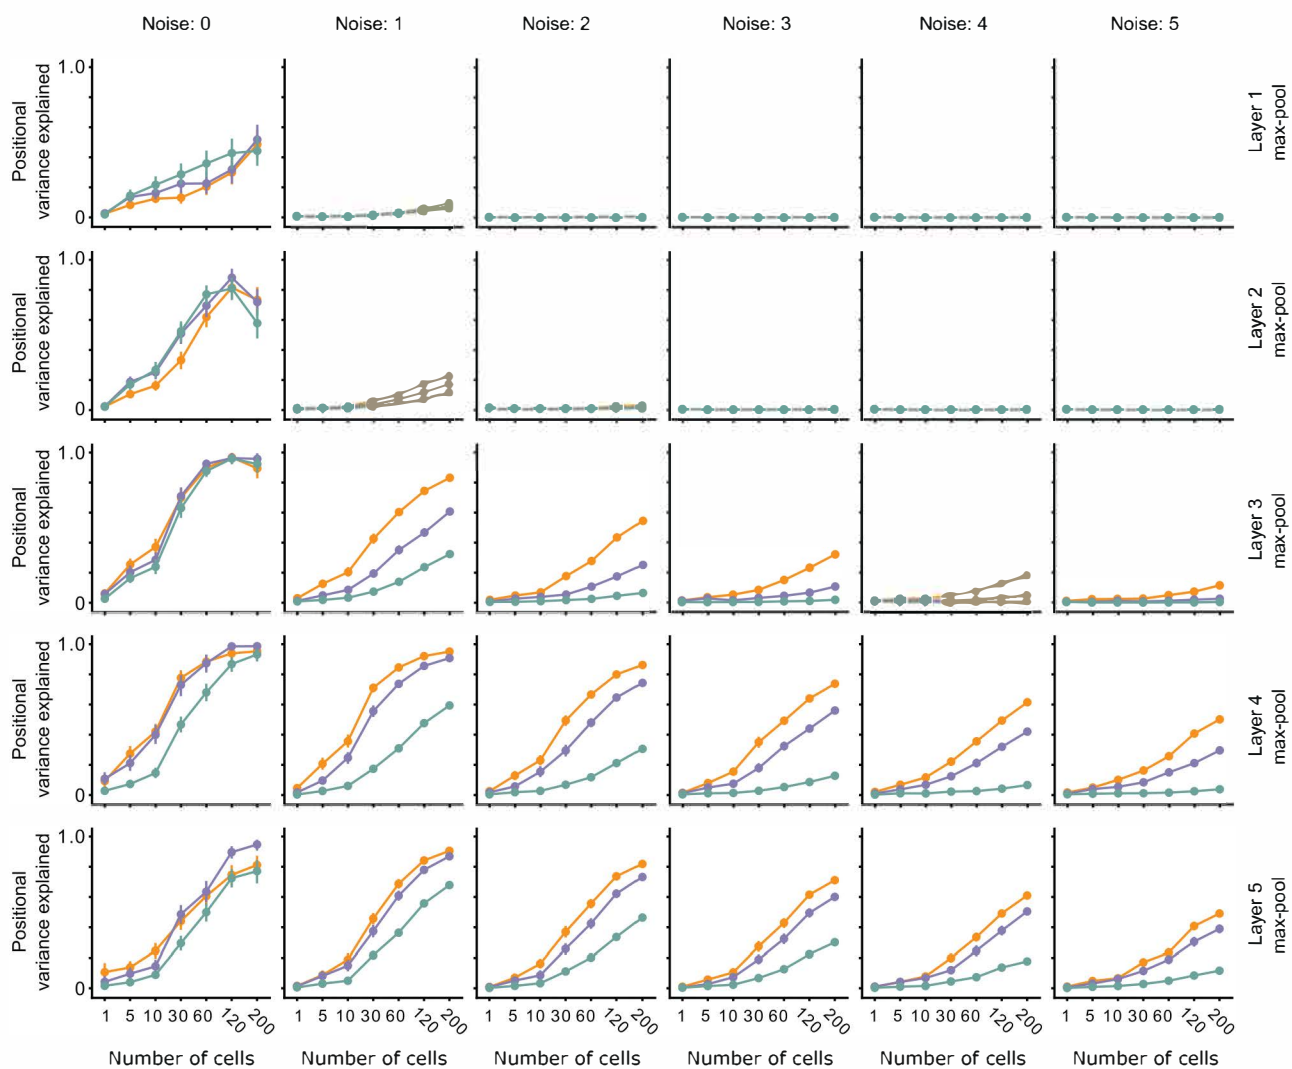

**Figure 7-figure supplement 2**

Supplement: supp [file elife-74394-supp-v1.zip]

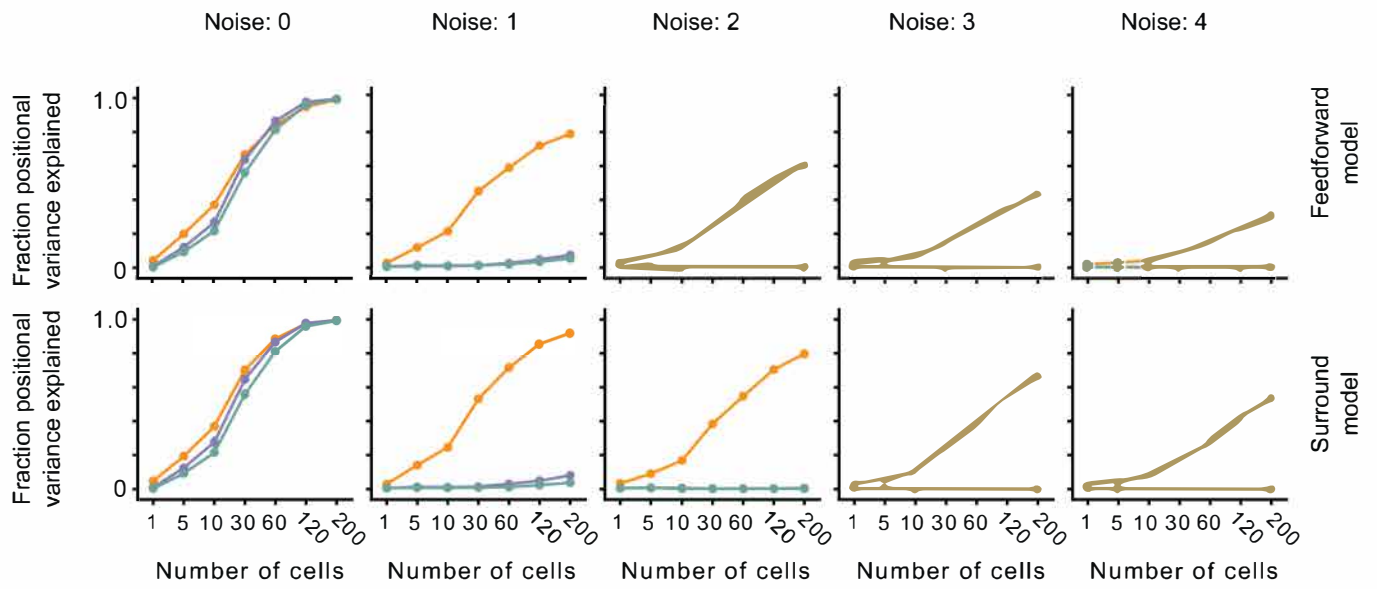

**Figure 7-figure supplement 1**

Supplement: supp [file elife-74394-supp-v1.zip]
